# Supplementary material for: Effects of Seedling Size, Stock Type, and Mechanical Site Preparation Method on Initial Survival and Growth of Japanese Larch (Larix kaempferi) Seedlings
Source: MDPI journal article supplement (doi:10.3390/f14040784), 2023-04-11
Supplement: s1 [file s1]

## Supplementary Materials

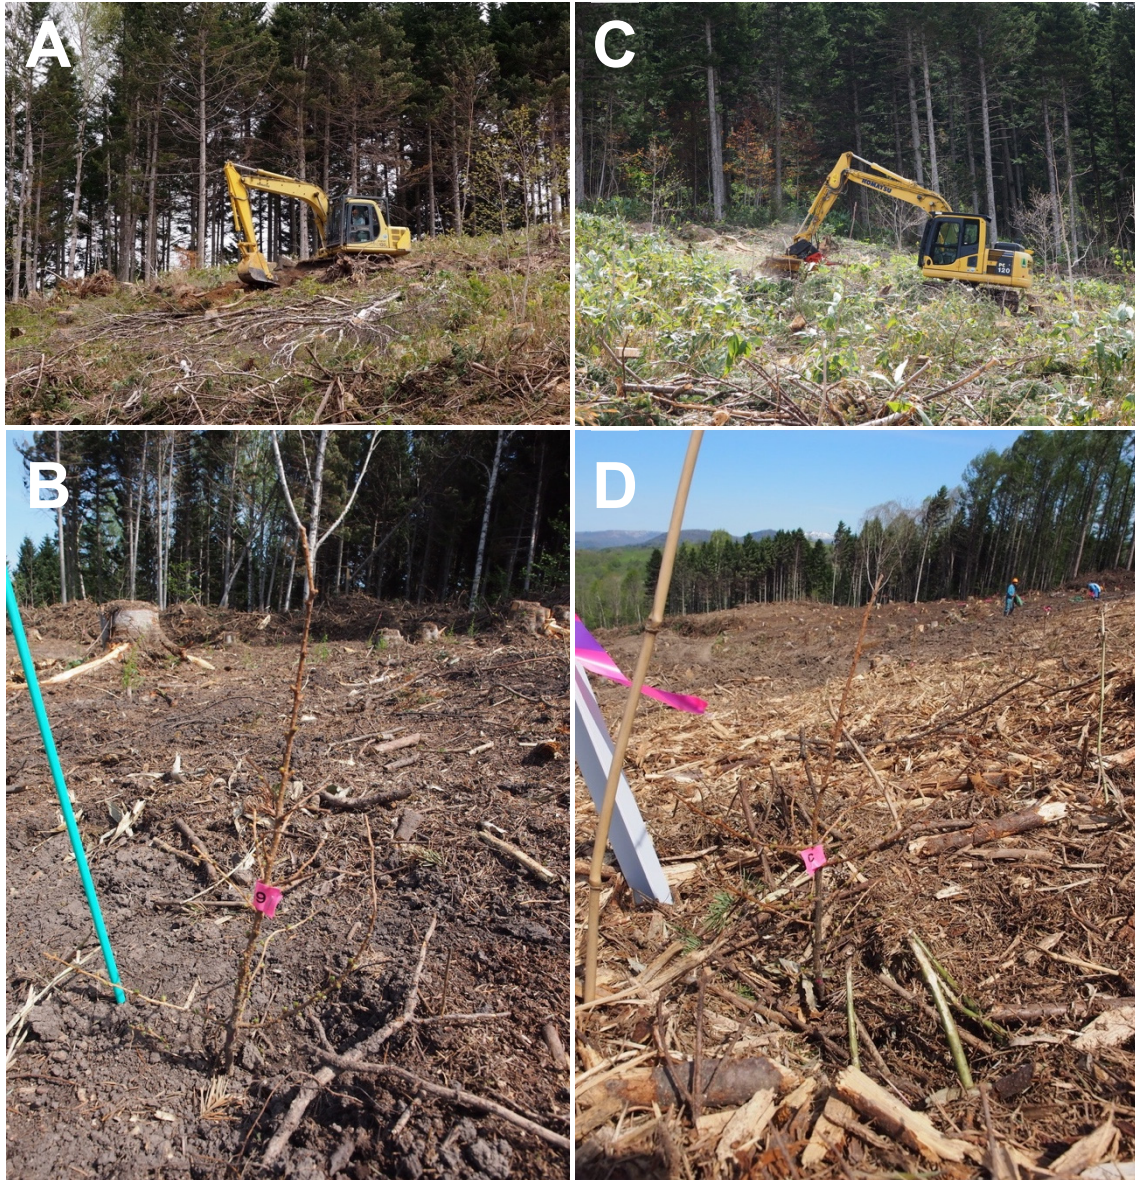

**Figure S1.** Photographs of the mechanical site preparation (A, C) and the forest floor after preparation (B, D). A, B: Soil scarification by bucket site preparation, C, D: Mulching by mulcher site preparation.

**Table S1.** Percentage of number of planted seedlings that had an initial root collar diameter (RCD) of 7.3 mm or larger and number of observations (*n*) by stock type.

| Stock type     | Percentage of initial RCD<br>larger than 7.3 mm | <i>n</i> |
|----------------|-------------------------------------------------|----------|
| Bareroot (1+2) | 97%                                             | 60       |
| Bareroot (1+1) | 33%                                             | 60       |
| LIECO390 (0+1) | 20%                                             | 30       |
| JFA300.C (1+2) | 30%                                             | 30       |
| JFA300.E (1+2) | 0%                                              | 30       |
| HRO200 (1+1)   | 18%                                             | 60       |
| BCC150 (0+2)   | 0%                                              | 60       |
